# Supplementary material for: First-in-human Phase I Trial of TPST-1120, an Inhibitor of PPARα, as Monotherapy or in Combination with Nivolumab, in Patients with Advanced Solid Tumors
Source: PubMed Central journal article supplement (PMC11025498; doi:10.1158/2767-9764.crc-24-0082), 2024-04-18
Supplement: crc-24-0082-s01.pdf [file crc-24-0082-s01.pdf]

**Supplementary Table S1. Additional PPAR- $\alpha$  Associated Genes Monitored**

| <b>HGNC Gene Symbol</b> | <b>Gene Name</b>                                                              |
|-------------------------|-------------------------------------------------------------------------------|
| <i>ACAA2</i>            | acetyl-CoA acyltransferase 2                                                  |
| <i>ACAD8</i>            | acyl-CoA dehydrogenase family member 8                                        |
| <i>ACOX1</i>            | acyl-CoA oxidase 1                                                            |
| <i>ACSL3</i>            | acyl-CoA synthetase long chain family member 3                                |
| <i>ACSL5</i>            | acyl-CoA synthetase long chain family member 5                                |
| <i>APOA5</i>            | apolipoprotein A5 (APOA-V)                                                    |
| <i>CPT1A</i>            | carnitine palmitoyltransferase 1A                                             |
| <i>CPT1B</i>            | carnitine palmitoyltransferase 1B                                             |
| <i>CPT2</i>             | carnitine palmitoyltransferase 2                                              |
| <i>CYP1A1</i>           | cytochrome P450 family 1 subfamily A member 1                                 |
| <i>CYP4A11</i>          | cytochrome P450 family 4 subfamily A member 11                                |
| <i>FABP1</i>            | fatty acid binding protein 1                                                  |
| <i>FABP3</i>            | fatty acid binding protein 3                                                  |
| <i>FABP4</i>            | fatty acid binding protein 4                                                  |
| <i>FABP5</i>            | fatty acid binding protein 5                                                  |
| <i>FADS2</i>            | acyl-CoA 6-desaturase                                                         |
| <i>FASN</i>             | fatty acid synthase                                                           |
| <i>FGF21</i>            | fibroblast growth factor 21                                                   |
| <i>HADHA</i>            | hydroxyacyl-CoA dehydrogenase trifunctional multienzyme complex subunit alpha |
| <i>HADHB</i>            | hydroxyacyl-CoA dehydrogenase trifunctional multienzyme complex subunit beta  |
| <i>HMGCS2</i>           | 3-hydroxy-3-methylglutaryl-CoA synthase 2                                     |
| <i>MT1A</i>             | Metallothionein 1A                                                            |
| <i>PANK1</i>            | pantothenate kinase 1                                                         |
| <i>PDK4</i>             | pyruvate dehydrogenase kinase 4                                               |
| <i>PLIN1</i>            | perilipin 1                                                                   |
| <i>PPARA</i>            | peroxisome proliferator activated receptor alpha                              |
| <i>PPARD</i>            | peroxisome proliferator activated receptor delta                              |
| <i>PPARGC1A</i>         | PPARG coactivator 1 alpha                                                     |
| <i>SLC25A20</i>         | solute carrier family 25 member 20                                            |
| <i>VNN1</i>             | vanin 1                                                                       |
