# Supplementary material for: First-in-human Phase I Trial of TPST-1120, an Inhibitor of PPARα, as Monotherapy or in Combination with Nivolumab, in Patients with Advanced Solid Tumors
Source: PubMed Central journal article supplement (PMC11025498; doi:10.1158/2767-9764.crc-24-0082), 2024-04-18
Supplement: crc-24-0082-s02.pdf [file crc-24-0082-s02.pdf]

**Supplementary Table S2. Summary of pharmacokinetics of 600 mg TPST-1120 twice daily as a single agent and in combination with nivolumab after single dose or at steady state (cycle 1 day 8)**

| Parameter                                    | 600 mg BID Monotherapy + Combination |                 |
|----------------------------------------------|--------------------------------------|-----------------|
|                                              | n                                    | Mean (CV%)      |
| <b>Single dose</b>                           |                                      |                 |
| AUC <sub>0-<math>\tau</math></sub> (ng*h/mL) | 15                                   | 12,784.7 (58.7) |
| C <sub>max</sub> (ng/mL)                     | 15                                   | 3,634.7 (52.8)  |
| T <sub>max</sub> (h)                         | 15                                   | 2 <sup>a</sup>  |
| Half-life (h)                                | 11                                   | 4.25 (98.4)     |
| CL/F (L/h)                                   | 11                                   | 46.44 (56.6)    |
| Vz/F (L)                                     | 11                                   | 296.5 (154.2)   |
| <b>Steady state</b>                          |                                      |                 |
| AUC <sub>0-12</sub> (ng*h/mL)                | 13                                   | 13,444.6 (49.9) |
| C <sub>max</sub> (ng/mL)                     | 13                                   | 3,675.4 (47.9)  |
| T <sub>max</sub> (h)                         | 13                                   | 1 <sup>a</sup>  |
| CL/F (L/h)                                   | 13                                   | 51.4 (32.6)     |
| R <sub>ac</sub> (AUC)                        | 13                                   | 1.08            |

Abbreviations: AUC<sub>0- $\tau$</sub> , area under the concentration time curve, from time 0 to the last time point with a quantifiable plasma concentration (C1D1 single dose only); AUC<sub>0-12</sub>, area under the concentration time curve from time 0 to 12 hours; C<sub>max</sub>, maximum observed concentration in plasma; CL/F, apparent oral clearance; CV, coefficient of variation; R<sub>ac</sub>, Ratio of accumulation of drug at steady state compared to single dose; T<sub>max</sub>, time of maximum observed concentration in plasma; Vz/F, apparent oral volume of distribution.

<sup>a</sup>Median value.
