# Supplementary material for: First-in-human Phase I Trial of TPST-1120, an Inhibitor of PPARα, as Monotherapy or in Combination with Nivolumab, in Patients with Advanced Solid Tumors
Source: PubMed Central journal article supplement (PMC11025498; doi:10.1158/2767-9764.crc-24-0082), 2024-04-18
Supplement: crc-24-0082-s03.pdf [file crc-24-0082-s03.pdf]

**Supplementary Table S3. Summary of Differentially Expressed Genes in PR Patients (p-value < 0.05 by Mann-Whitney U-test vs. PR/SD patients) on Cycle 1 Day 8**

| <b>Gene</b>    | <b>Name</b>                    | <b>Function</b>                                        | <b>Differential Expression in PR patients</b> |
|----------------|--------------------------------|--------------------------------------------------------|-----------------------------------------------|
| <i>RORC</i>    | RAR related Orphan Receptor C  | Transcriptional regulator of Th17 cell differentiation | Increased                                     |
| <i>APOE</i>    | Apolipoprotein E               | Lipid metabolism                                       | Increased                                     |
| <i>MAGEA12</i> | Melanoma-associated Antigen-12 | Repressor of tumor-suppressor genes                    | Increased                                     |
| <i>SYT17</i>   | Synaptotagmin 17               | Intracellular membrane trafficking                     | Increased                                     |
| <i>PVR</i>     | Poliovirus Receptor, CD155     | TIGIT ligand                                           | Decreased                                     |
| <i>CFB</i>     | Complement Factor B            | Alternative complement pathway, C3B convertase         | Decreased                                     |
