# Supplementary material for: First-in-human Phase I Trial of TPST-1120, an Inhibitor of PPARα, as Monotherapy or in Combination with Nivolumab, in Patients with Advanced Solid Tumors
Source: PubMed Central journal article supplement (PMC11025498; doi:10.1158/2767-9764.crc-24-0082), 2024-04-18
Supplement: crc-24-0082-s04.pdf [file crc-24-0082-s04.pdf]

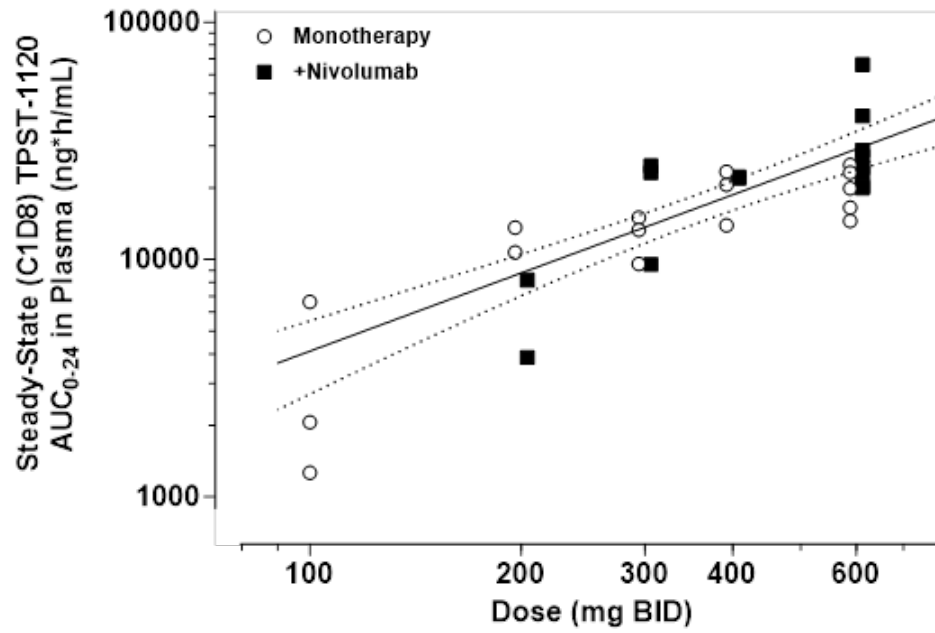

**Supplementary Figure S1. Relationship between dose (mg BID) and AUC<sub>0-24</sub> of TPST-1120 at steady state on Cycle 1 Day 8. Monotherapy and nivolumab combination data points offset slightly for clarity.**
