# Supplementary material for: First-in-human Phase I Trial of TPST-1120, an Inhibitor of PPARα, as Monotherapy or in Combination with Nivolumab, in Patients with Advanced Solid Tumors
Source: PubMed Central journal article supplement (PMC11025498; doi:10.1158/2767-9764.crc-24-0082), 2024-04-18
Supplement: crc-24-0082-s06.pdf [file crc-24-0082-s06.pdf]

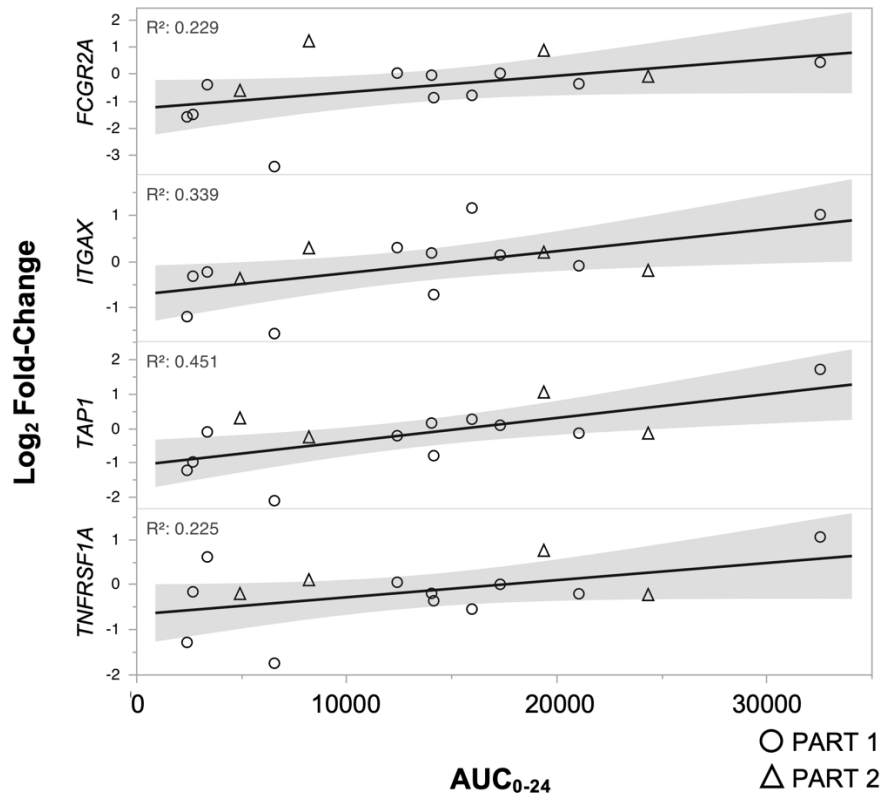

**Supplementary Figure S3. Genes differentially expressed as a function of BOR on cycle 3 day 1.** Genes differentially expressed on C3D1 versus treatment baseline, as a function of TPST-1120 exposure. Linear associations of C3D1 Log<sub>2</sub> fold change in expression levels of indicated genes and TPST-1120 AUC<sub>0-24</sub>. Data are shown for both TPST-1120 monotherapy (part 1) and TPST-1120 + nivolumab combination therapy (part 2).
