# Supplementary material for: First-in-human Phase I Trial of TPST-1120, an Inhibitor of PPARα, as Monotherapy or in Combination with Nivolumab, in Patients with Advanced Solid Tumors
Source: PubMed Central journal article supplement (PMC11025498; doi:10.1158/2767-9764.crc-24-0082), 2024-04-18
Supplement: crc-24-0082-s07.pdf [file crc-24-0082-s07.pdf]

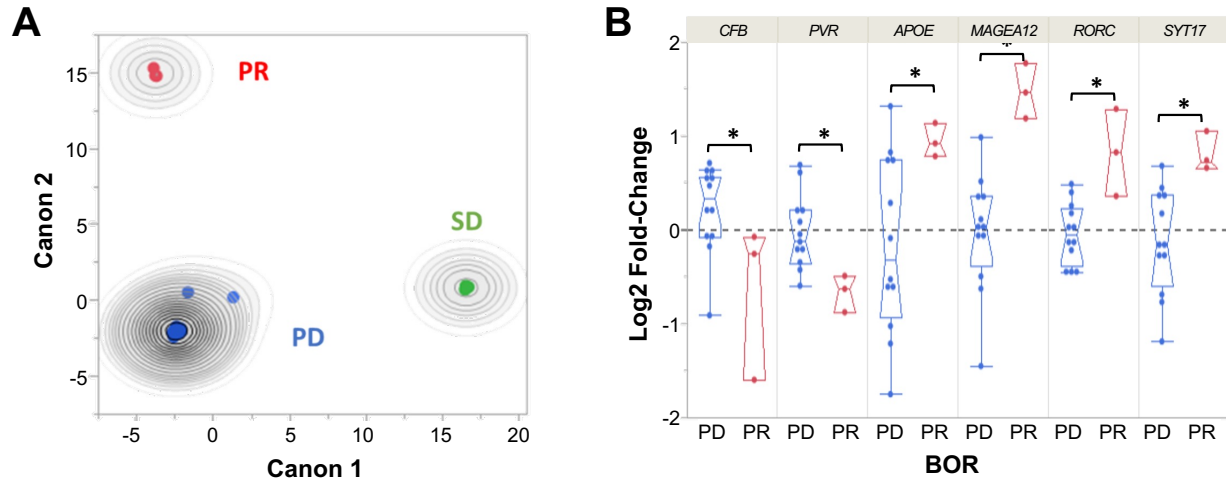

**Supplementary Figure S4. Genes differentially expressed as a function of BOR on day 8.** (A) Linear discriminant analysis of Log<sub>2</sub> fold change in expression levels of 780 genes in patients stratified based on BOR. PR: partial response; SD: stable disease; PD: progressive disease. (B) Genes that maximally discriminate between PR and PD patients enrolled in combination therapy arm. \* p<0.05 by Mann-Whitney U-test.
