# Supplementary material for: First-in-human Phase I Trial of TPST-1120, an Inhibitor of PPARα, as Monotherapy or in Combination with Nivolumab, in Patients with Advanced Solid Tumors
Source: PubMed Central journal article supplement (PMC11025498; doi:10.1158/2767-9764.crc-24-0082), 2024-04-18
Supplement: crc-24-0082-s08.pdf [file crc-24-0082-s08.pdf]

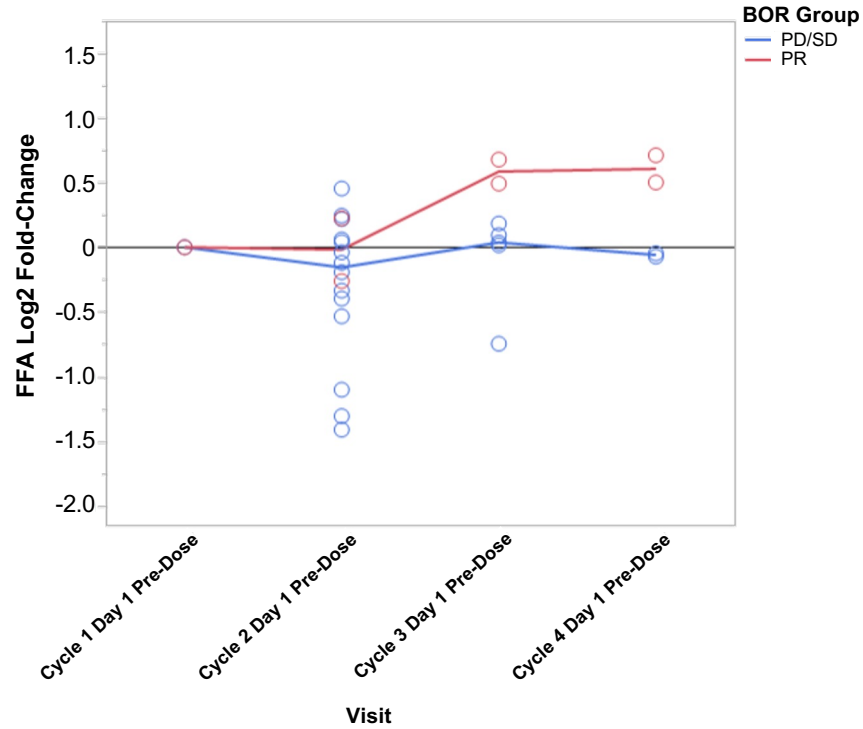

**Supplementary Figure S5. Elevated circulating free fatty acids (FFA) at days 57 and 85 in PR patients.** Log<sub>2</sub>-fold changes in baseline normalized FFA in patients enrolled in Part 2. Samples were collected prior to TPST-1120 dose administration on day 1 of each 28-day cycle. Blue symbols: PD/SD patients; Red symbols: PR patients.
